# Supplementary material for: Large-area Co(OH)2 nanoflower array films decorated with Ag nanoparticles as sensitive SERS substrates
Source: Royal Society of Chemistry journal article supplement (doi:10.1039/d2ce00572g), 2022-01-01
Supplement: d2ce00572g1.pdf [file d2ce00572g1.pdf]

## Electronic Supplementary Information

### Large-area $\text{Co}(\text{OH})_2$ Nanoflower Array Films Decorated with Ag Nanoparticles as Sensitive SERS Substrates

Tingting Fan,<sup>#a</sup> Yan Ke,<sup>#b</sup> Lijun Zhang,<sup>a</sup> Li Cai,<sup>\*a</sup> Zhongbo Li<sup>\*a</sup>

a. College of Light-Textile Engineering and Art, Anhui Agricultural University, Hefei 230036, China.

b. Guangdong Provincial Key Laboratory of HighEnd Eco Dyeing and Finishing Technology, Guangdong Esquel Textile Co. Ltd., Foshan, 528500, China. E-mail: keyancosb@163.com

\* Correspondence: zbli@ahau.edu.cn, licai@ahau.edu.cn; Tel +86-551-65786737

# These authors contributed equally to this work

#### Part I: Figure S1 to S8

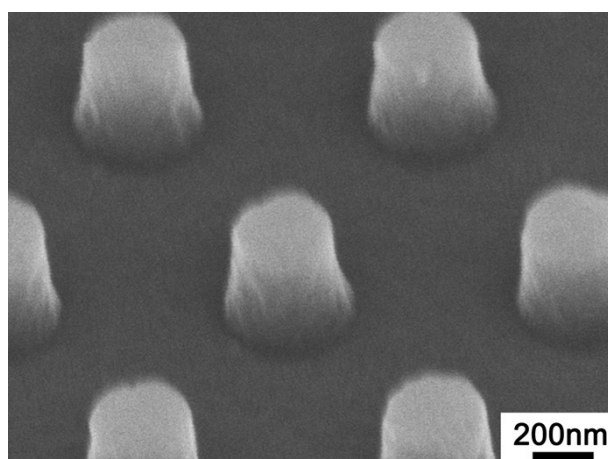

**Fig. S1** SEM images of PAN nanopillar

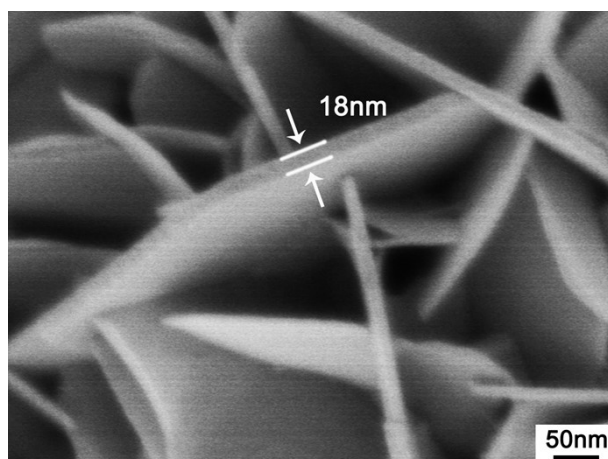

**Fig. S2**  $\text{Co(OH)}_2$  nanosheets synthesized with deposition current of  $0.75 \text{ mA/cm}^2$  for 6 min.

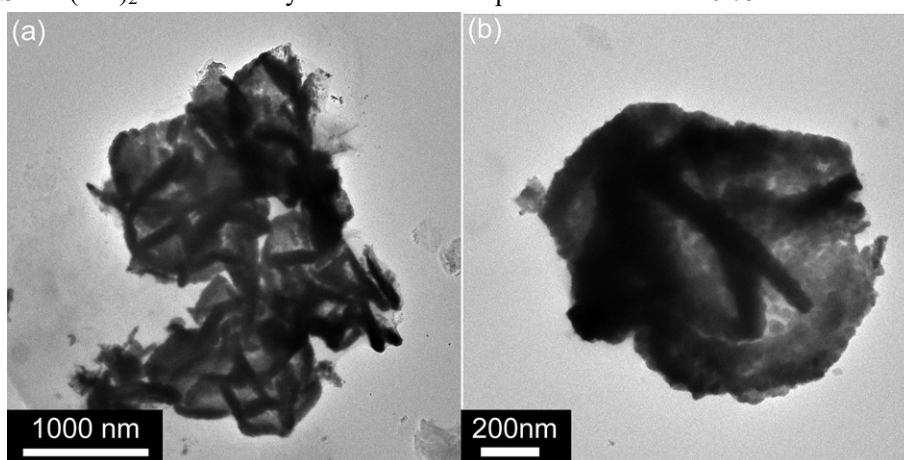

**Fig. S3** (a-b) TEM image of  $\text{Ag@Co(OH)}_2$  nanoflowers broken off from the  $\text{Ag@Co(OH)}_2$  nanoflower arrays shown in Fig. 3e.

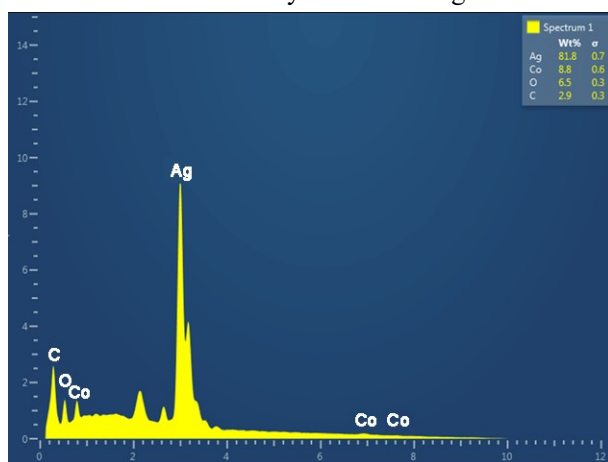

**Fig. S4** EDS spectrum of  $\text{Ag@Co(OH)}_2$  nanoflower arrays shown in Fig. 3e.

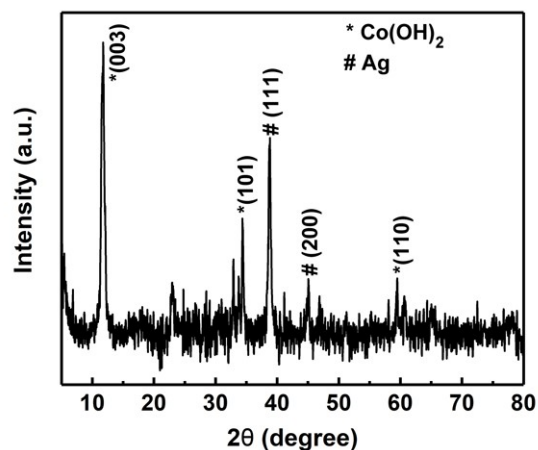

Fig. S5 XRD of Ag@Co(OH)<sub>2</sub> nanoflower arrays shown in Fig. 3e.

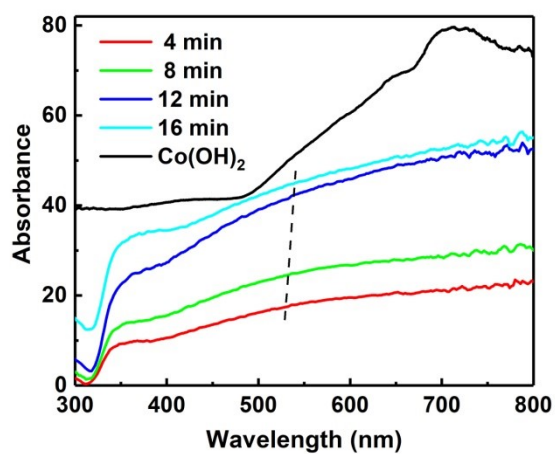

Fig. S6 UV-vis spectra of Ag@Co(OH)<sub>2</sub> nanoflower arrays prepared with different Ag-sputtering durations.

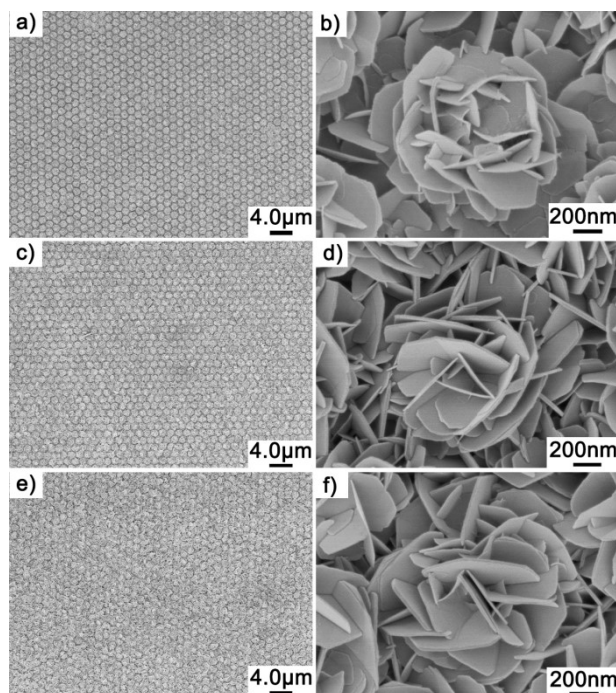

Fig. S7 (a-c) SEM images of Co(OH)<sub>2</sub> nanoflower arrays prepared under different deposition currents for 9 min: (a-b) 0.5 mA/cm<sup>2</sup>, (c-d) 0.75 mA/cm<sup>2</sup>, (e-f) 1.0 mA/cm<sup>2</sup>.

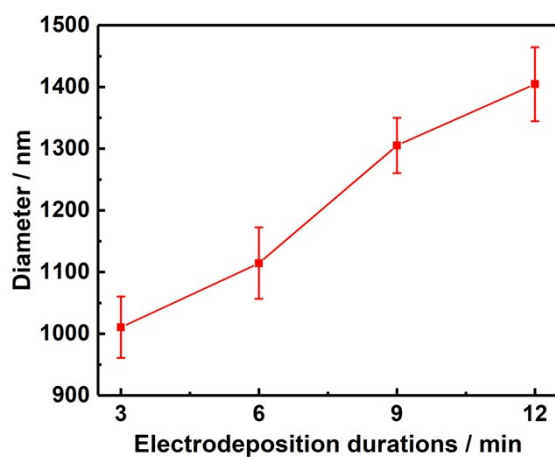

**Fig. S8** Diameter of  $\text{Co(OH)}_2$  nanoflowers obtained at different deposition durations (3-12 min). The error bars were obtained based on 40 independent measurements.

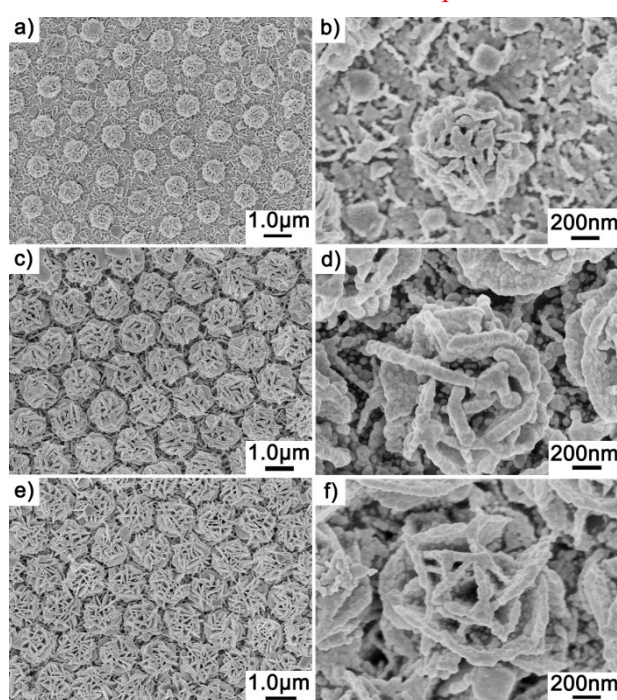

**Fig. S9** SEM images of Ag NPs sputtered on corresponding  $\text{Co(OH)}_2$  nanoflower arrays shown in Fig. S7. The Ag-sputtering duration was set as 12 min.

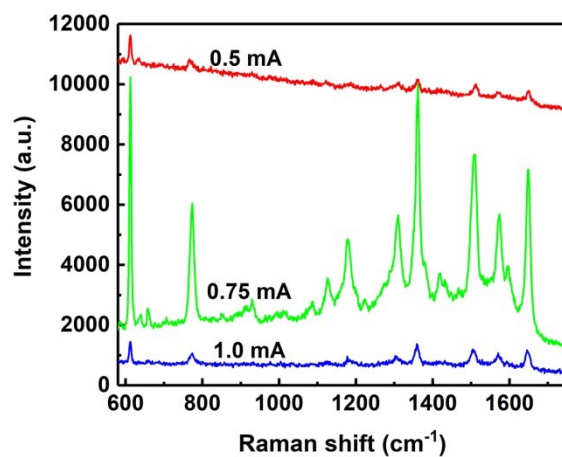

**Fig. S10** SERS spectra of  $10^{-7}$  M R6G collected on Ag NPs sputtered on  $\text{Co(OH)}_2$  nanoflower

arrays shown in Fig. S9.

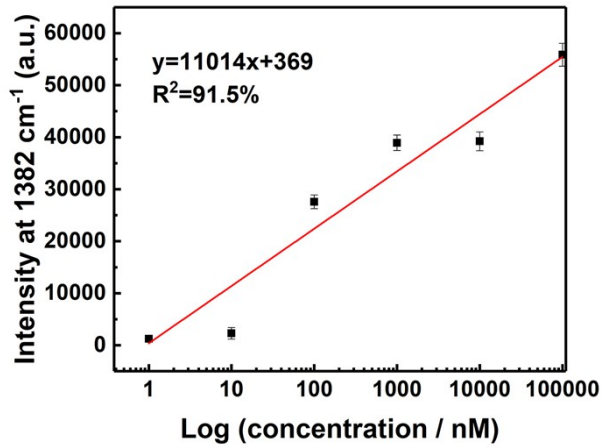

**Fig. S11** The linear relationship between the concentration of the thiram molecules and the SERS intensity at 1382 cm<sup>-1</sup>. The error bars were obtained based on five independent measurements.

## Part S2: Estimation of enhancement factor

The enhancement factor is calculated to verify the sensitivity of the substrate. The peak at 1078 cm<sup>-1</sup> (for 4-ATP molecules) was used to estimate the enhancement factor (EF). The EF can be calculated by the following equation:

$$EF = (I_{SERS} / I_{Ref}) \cdot (N_{Ref} / N_{SERS})$$

Where  $I_{SERS}$  and  $I_{Ref}$  represent the SERS intensity of 1  $\mu$ L 10<sup>-9</sup> M 4-ATP alcoholic solution dispersed on 25 mm<sup>2</sup> substrates and 1  $\mu$ L 10<sup>-3</sup> M 4-ATP ethanol solution on 28 mm<sup>2</sup> Si wafer, respectively;  $N_{SERS}$  and  $N_{Ref}$  represent the number of 4-ATP molecules exposed to the laser on the Ag@Co(OH)<sub>2</sub> substrates and Si wafer during the SERS measurement. Herein, a certain concentration ( $C_{SERS}$ ) and volume ( $V_{SERS}$ ) 4-ATP ethanol solution was dispersed to an area of  $S_{SERS}$  at the Ag@Co(OH)<sub>2</sub> substrates. For non-SERS Raman spectra, a certain volume ( $V_{Ref}$ ) and concentration ( $C_{Ref}$ ) 4-ATP ethanol solution was dispersed to an area of  $S_{Ref}$  at Si substrate. Both the substrates were dried in the air. Then the foregoing equation becomes:

$$EF = (I_{SERS} / I_{Ref}) \cdot (C_{Ref} V_{Ref}) / (C_{SERS} V_{SERS}) \cdot (S_{SERS} / S_{Ref})$$

According to the calculation, average enhancement factor for the band at 1078 cm<sup>-1</sup> is about 1.77  $\times 10^7$ .

**Figure for estimation of enhancement factor:**

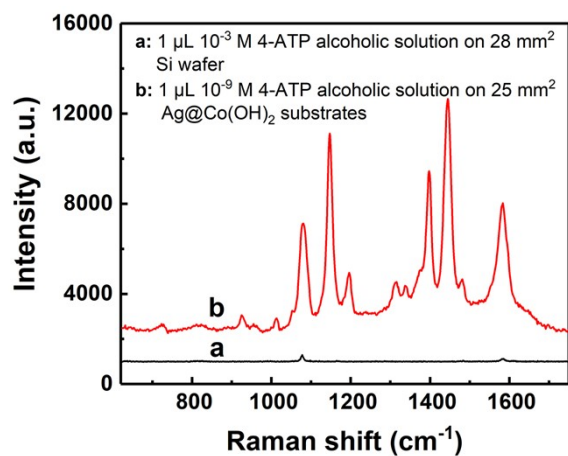

**Fig. S10** (a) Raman spectrum of 4-ATP obtained by dispersing 1 μL 10<sup>-3</sup> M 4-ATP alcoholic solution on 28 mm<sup>2</sup> Si wafer. (b) SERS spectrum of 1 μL 10<sup>-9</sup> M 4-ATP alcoholic solution dispersed on 25 mm<sup>2</sup> substrates. The exposure time was 60 s.
